# Supplementary material for: Recovery of Fatty Acid and Volatile Flavor Compound Composition in Farmed Tiger Puffer (Takifugu rubripes) with a Fish Oil-Finishing Strategy
Source: MDPI journal article supplement (doi:10.3390/md21020122), 2023-02-13
Supplement: s1 [file s1]

**Table S1** Volatile flavor compounds detected in the muscle

| Compound | CAS number | Formula | Relative<br>molecule<br>mass | Retention<br>index | Retention<br>time (s) | Normalized<br>drift time | Average peak area |        |         |        | Flavor<br>description |
|----------|------------|---------|------------------------------|--------------------|-----------------------|--------------------------|-------------------|--------|---------|--------|-----------------------|
|          |            |         |                              |                    |                       |                          | FO-G              | PO-G   | FO-F    | PO-F   |                       |
| 1        | *          | *       | *                            | 533.1              | 118.347               | 0.95788                  | 106.82            | 159.40 | 169.69  | 181.98 |                       |
| 2        | *          | *       | *                            | 515.8              | 113.690               | 1.15655                  | 388.63            | 295.70 | 261.49  | 241.23 |                       |
| 3        | *          | *       | *                            | 507.7              | 111.498               | 1.18227                  | 240.25            | 263.02 | 329.49  | 244.31 |                       |
| 4        | *          | *       | *                            | 599.1              | 136.154               | 1.29339                  | 437.65            | 372.84 | 568.55  | 373.52 |                       |
| 5        | *          | *       | *                            | 692.7              | 161.956               | 1.21725                  | 178.40            | 220.62 | 208.47  | 267.71 |                       |
| 6        | *          | *       | *                            | 697.5              | 163.907               | 1.39281                  | 644.14            | 598.10 | 641.70  | 502.03 |                       |
| 7        | *          | *       | *                            | 752.8              | 186.329               | 1.31074                  | 70.00             | 40.63  | 59.50   | 19.42  |                       |
| 8        | *          | *       | *                            | 764.8              | 191.200               | 1.46707                  | 102.63            | 91.84  | 86.88   | 79.24  |                       |
| 9        | *          | *       | *                            | 809.4              | 212.579               | 1.11349                  | 862.08            | 559.64 | 704.56  | 699.02 |                       |
| 10       | *          | *       | *                            | 796.3              | 205.543               | 1.44713                  | 1878.05           | 894.77 | 1190.06 | 891.42 |                       |
| 11       | *          | *       | *                            | 796.3              | 205.543               | 1.50379                  | 857.67            | 720.25 | 791.00  | 615.56 |                       |
| 12       | *          | *       | *                            | 839.2              | 228.546               | 1.13447                  | 387.43            | 168.84 | 178.41  | 193.38 |                       |
| 13       | *          | *       | *                            | 839.7              | 228.817               | 1.53107                  | 236.27            | 45.67  | 63.27   | 38.70  |                       |
| 14       | *          | *       | *                            | 825.6              | 221.239               | 1.15965                  | 68.44             | 83.53  | 33.29   | 33.51  |                       |
| 15       | *          | *       | *                            | 850.3              | 234.500               | 1.54576                  | 125.06            | 39.85  | 50.65   | 19.19  |                       |
| 16       | *          | *       | *                            | 869.5              | 244.783               | 1.22995                  | 49.72             | 48.59  | 27.27   | 24.10  |                       |
| 17       | *          | *       | *                            | 877                | 248.800               | 1.11836                  | 123.92            | 73.24  | 89.92   | 66.86  |                       |

|                        |          |        |       |        |         |         |         |         |         |         |
|------------------------|----------|--------|-------|--------|---------|---------|---------|---------|---------|---------|
| 18                     | *        | *      | *     | 945.8  | 302.630 | 1.26479 | 529.75  | 263.18  | 311.89  | 232.97  |
| 19                     | *        | *      | *     | 953.1  | 308.857 | 1.345   | 281.31  | 265.31  | 79.88   | 58.91   |
| 20                     | *        | *      | *     | 954    | 309.686 | 1.74832 | 33.85   | 28.63   | 20.76   | 16.40   |
| 21                     | *        | *      | *     | 975.6  | 328.085 | 1.1044  | 1146.98 | 580.39  | 701.25  | 597.52  |
| 22                     | *        | *      | *     | 989.2  | 339.685 | 1.4167  | 1439.37 | 1505.30 | 1350.99 | 754.68  |
| 23                     | *        | *      | *     | 959.2  | 314.086 | 1.56641 | 35.38   | 27.23   | 19.10   | 14.44   |
| 24                     | *        | *      | *     | 536.3  | 119.207 | 1.21169 | 121.26  | 74.49   | 57.22   | 61.49   |
| hexanal monomer        | C66251   | C6H12O | 100.2 | 798.3  | 206.593 | 1.25750 | 1443.08 | 1670.85 | 1621.18 | 1633.92 |
| hexanal dimer          | C66251   | C6H12O | 100.2 | 797.4  | 206.119 | 1.56335 | 3371.09 | 4451.16 | 4020.98 | 3215.95 |
| Heptanal monomer       | C111717  | C7H14O | 114.2 | 903.3  | 266.386 | 1.33578 | 1529.24 | 1398.13 | 1679.97 | 1223.29 |
| Heptanal dimer         | C111717  | C7H14O | 114.2 | 902.9  | 266.043 | 1.69764 | 1076.85 | 758.68  | 1154.96 | 489.73  |
| 2-pentenal (E) monomer | C1576870 | C5H8O  | 84.1  | 751.4  | 185.745 | 1.10570 | 564.71  | 424.45  | 507.38  | 263.01  |
| 2-pentenal (E) dimer   | C1576870 | C5H8O  | 84.1  | 751.7  | 185.878 | 1.36295 | 436.24  | 168.20  | 252.15  | 59.96   |
| Octanal monomer        | C124130  | C8H16O | 128.2 | 1006.8 | 360.810 | 1.40319 | 2153.71 | 1724.51 | 2184.78 | 1193.04 |
| Octanal dimer          | C124130  | C8H16O | 128.2 | 1006.5 | 360.279 | 1.82740 | 498.51  | 310.41  | 487.06  | 172.83  |
| 2-Ethyl-1-hexanol      | C104767  | C8H18O | 130.2 | 1030.6 | 394.950 | 1.41081 | 330.81  | 267.16  | 169.00  | 104.21  |
| Nonanal monomer        | C124196  | C9H18O | 142.2 | 1111.1 | 510.795 | 1.47572 | 3096.13 | 2742.43 | 2900.36 | 2106.80 |
| Nonanal dimer          | C124196  | C9H18O | 142.2 | 1110.1 | 509.264 | 1.94344 | 428.21  | 377.09  | 357.33  | 241.42  |
| 1-butanol              | C71363   | C4H10O | 74.1  | 668.2  | 154.775 | 1.37675 | 972.73  | 332.08  | 446.13  | 388.89  |
| 2-Butanone monomer     | C78933   | C4H8O  | 72.1  | 591.1  | 133.993 | 1.05998 | 882.58  | 1045.07 | 939.92  | 1137.84 |
| 2-Butanone dimer       | C78933   | C4H8O  | 72.1  | 592.8  | 134.448 | 1.24806 | 1434.57 | 1395.76 | 1169.98 | 1254.01 |
| ethyl acetate monomer  | C141786  | C4H8O2 | 88.1  | 612.2  | 139.688 | 1.09847 | 291.90  | 293.25  | 476.52  | 340.97  |

|                            |          |        |       |       |         |         |         |         |         |         |
|----------------------------|----------|--------|-------|-------|---------|---------|---------|---------|---------|---------|
| ethyl acetate dimer        | C141786  | C4H8O2 | 88.1  | 609.7 | 139.005 | 1.33825 | 86.32   | 84.25   | 222.21  | 121.58  |
| 1-pentanol monomer         | C71410   | C5H12O | 88.1  | 764.2 | 190.947 | 1.24696 | 392.27  | 437.98  | 430.58  | 304.64  |
| 1-pentanol dimer           | C71410   | C5H12O | 88.1  | 763.1 | 190.515 | 1.50913 | 36.82   | 44.92   | 38.70   | 22.07   |
| Benzaldehyde monomer       | C100527  | C7H6O  | 106.1 | 961.1 | 315.685 | 1.15486 | 774.78  | 796.97  | 585.02  | 581.17  |
| Benzaldehyde dimer         | C100527  | C7H6O  | 106.1 | 959.9 | 314.665 | 1.47145 | 187.31  | 194.54  | 100.44  | 109.17  |
| 1-Octen-3-ol monomer       | C3391864 | C8H16O | 128.2 | 983.2 | 334.568 | 1.16086 | 607.19  | 489.41  | 488.18  | 357.04  |
| 1-Octen-3-ol dimer         | C3391864 | C8H16O | 128.2 | 981.6 | 333.231 | 1.60055 | 72.93   | 49.34   | 50.38   | 41.04   |
| methyl acetate monomer     | C79209   | C3H6O2 | 74.1  | 533.2 | 118.379 | 1.03286 | 504.61  | 463.75  | 363.08  | 462.07  |
| methyl acetate dimer       | C79209   | C3H6O2 | 74.1  | 533.5 | 118.466 | 1.19366 | 152.64  | 120.20  | 94.99   | 108.28  |
| Ethanol                    | C64175   | C2H6O  | 46.1  | 467.7 | 100.721 | 1.04601 | 1155.10 | 1458.88 | 670.98  | 1824.88 |
| Acetone                    | C67641   | C3H6O  | 58.1  | 509.1 | 111.887 | 1.11790 | 841.36  | 827.05  | 886.95  | 942.99  |
| 1-propanol                 | C71238   | C3H8O  | 60.1  | 555.8 | 124.465 | 1.11001 | 2351.74 | 1907.09 | 1868.97 | 1650.91 |
| 1-penten-3-ol              | C616251  | C5H10O | 86.1  | 698.9 | 164.464 | 0.94049 | 4028.26 | 4021.47 | 3952.61 | 3241.32 |
| 3-methylbutanal            | C590863  | C5H10O | 86.1  | 659.6 | 152.480 | 1.40314 | 501.28  | 307.85  | 289.36  | 253.83  |
| 3-Pentanone                | C96220   | C5H10O | 86.1  | 696.1 | 163.349 | 1.35873 | 1031.99 | 664.06  | 755.89  | 588.07  |
| Pentanal                   | C110623  | C5H10O | 86.1  | 698.9 | 164.464 | 1.41966 | 515.87  | 578.55  | 636.68  | 419.04  |
| 3-methyl-2-butenal monomer | C107868  | C5H8O  | 84.1  | 740.8 | 181.465 | 1.08920 | 178.73  | 219.42  | 109.43  | 107.41  |
| 3-Methyl-2-butenal dimer   | C107868  | C5H8O  | 84.1  | 738.8 | 180.629 | 1.35460 | 71.76   | 59.22   | 28.11   | 12.39   |
| (E)-2-hexenal monomer      | C6728263 | C6H10O | 98.1  | 850.3 | 234.500 | 1.18379 | 1077.66 | 593.50  | 858.37  | 429.22  |
| (E)-2-Hexenal dimer        | C6728263 | C6H10O | 98.1  | 849.8 | 234.229 | 1.52163 | 160.67  | 57.55   | 116.41  | 25.24   |
| n-Hexanol                  | C111273  | C6H14O | 102.2 | 870.3 | 245.218 | 1.32654 | 64.23   | 62.12   | 57.23   | 35.58   |
| 4-heptenal (Z)             | C6728310 | C7H12O | 112.2 | 899.8 | 263.432 | 1.14948 | 1295.21 | 784.74  | 1154.53 | 609.55  |

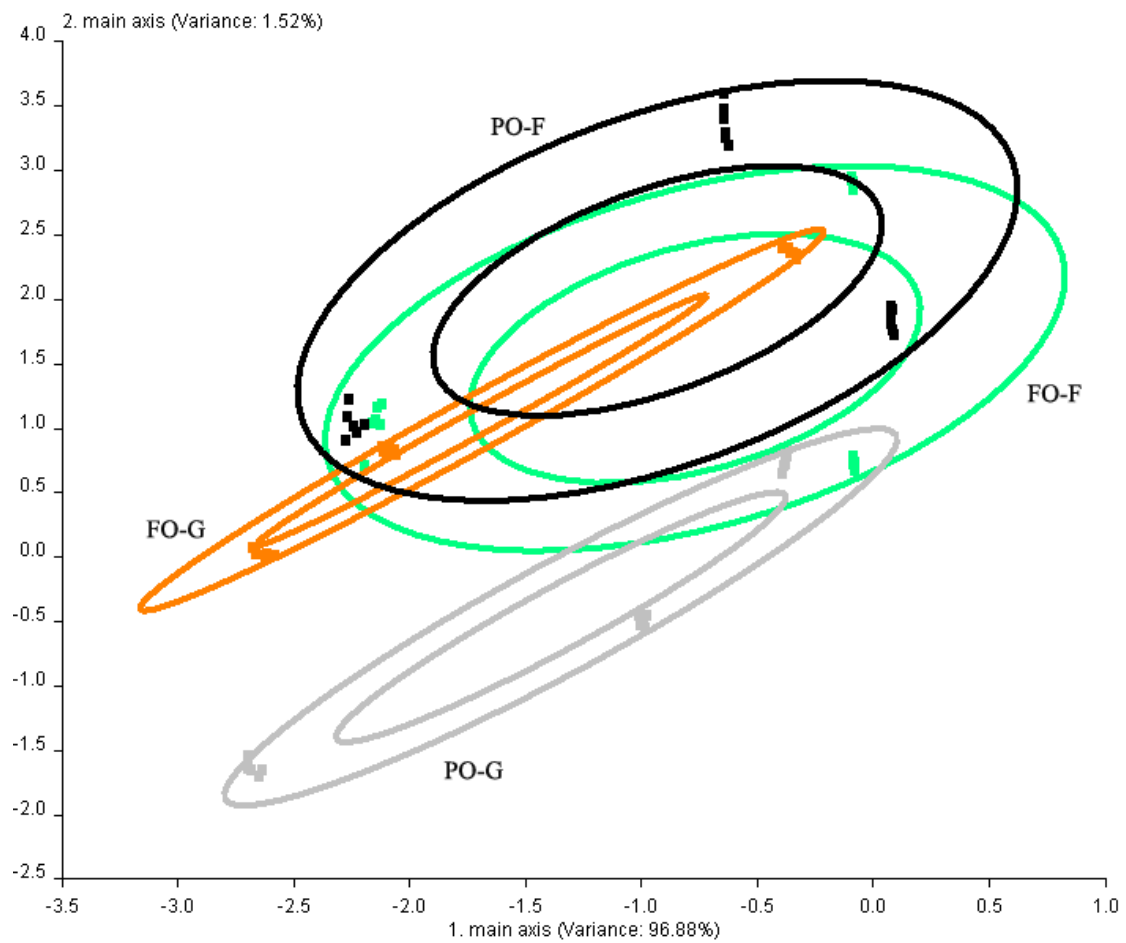

**Figure S1** Principal Component Analysis (PCA) of response values in the analysis with electronic nose. FO-G and PO-G: The fish oil and poultry oil group at the end of growing-out period, respectively; FO-F and PO-F: The fish oil and poultry oil group after the fish oil-finishing period, respectively. Small distance indicates high similarity, while far apart samples have significant differences.

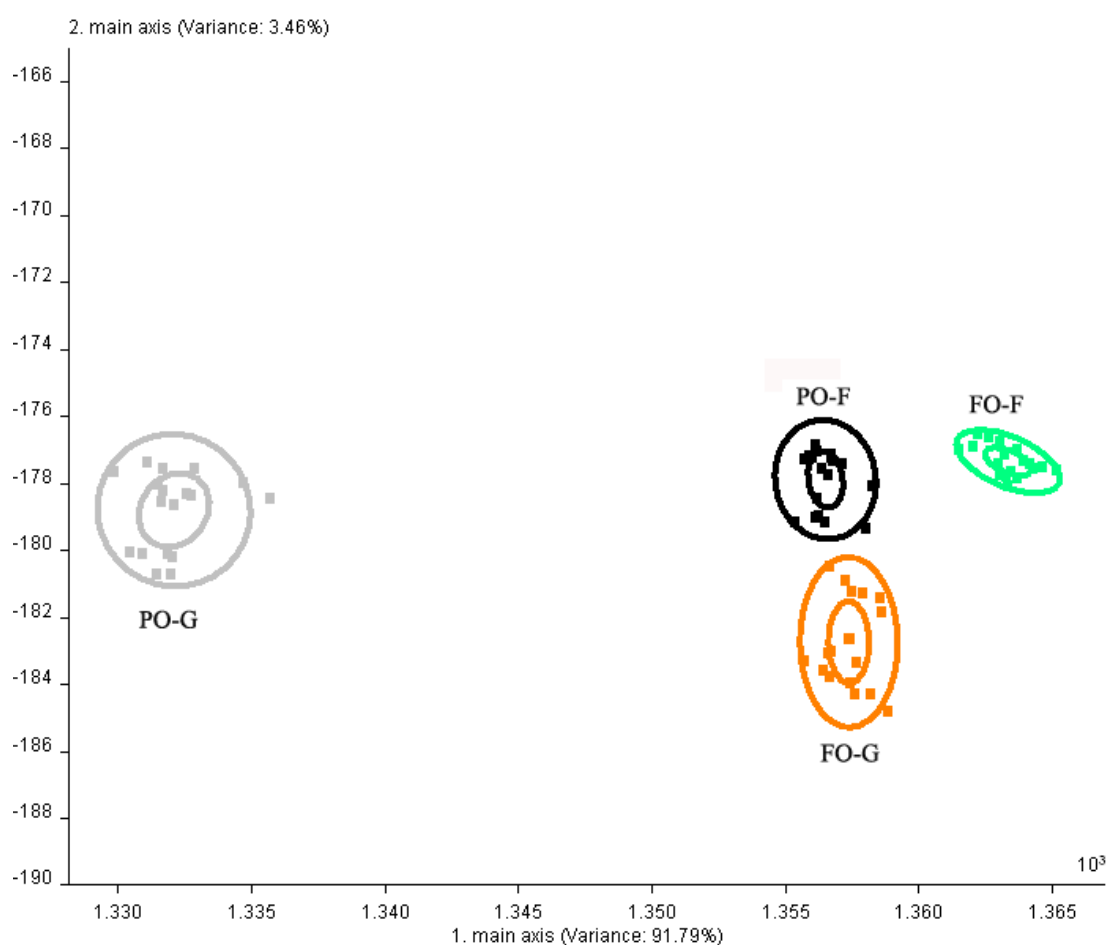

**Figure S2** Linear Discriminant Analysis (LDA) of response values in the analysis with electronic nose. FO-G and PO-G: The fish oil and poultry oil group at the end of growing-out period, respectively; FO-F and PO-F: The fish oil and poultry oil group after the fish oil-finishing period, respectively. LDA is aimed at selecting the projection direction with the best classification performance for sample data through the algorithm, so that each group of data can be separated as far as possible.
